# Supplementary material for: Assessment of the Long-Term Mental Health Effects on Austrian Students after COVID-19 Restrictions
Source: MDPI journal article supplement (doi:10.3390/ijerph192013110), 2022-10-12

## Supplementary Tables

**Supplementary Table S1.** Descriptive statistics of mental health outcomes for diverse adolescents.

|                             | Diverse       |               |
|-----------------------------|---------------|---------------|
|                             | t1            | t2            |
| <b>N</b>                    | 50            | 17            |
| <b>WHO-5</b> <i>M (SD)</i>  | 20.96 (15.83) | 20.47 (16.06) |
| <b>PHQ-9</b> <i>M (SD)</i>  | 18.24 (5.39)  | 18.53 (6.02)  |
| ≥11, % (N)                  | 94 (47)       | 94.1 (16)     |
| <b>GAD-7</b> <i>M (SD)</i>  | 14.22 (4.92)  | 13.53 (6.02)  |
| ≥11, % (N)                  | 72 (36)       | 70.6 (12)     |
| <b>ISI</b> <i>M (SD)</i>    | 12.38 (4.87)  | 14.00 (5.57)  |
| ≥15, % (N)                  | 30 (15)       | 41.2 (7)      |
| <b>PSS-10</b> <i>M (SD)</i> | 29.44 (7.31)  | 26.35 (7.79)  |
| ≥14, % (N)                  | 94 (47)       | 88.2 (15)     |

Note: t1: Sample from February 2021 (after one semester of remote schooling).t2:Sample from April-May 2022 (school opened and most restrictions lifted)

**Table S2.** General Linear Model for mental health outcomes with predictors gender, time and gender\*time interaction

| <b>Criterion</b> | <b>Predictor</b> | <b><i>b</i></b> | <b><i>SE</i></b> | <b><i>t</i></b> | <b><i>p</i></b> | <b><i>Adj. r<sup>2</sup></i></b> |
|------------------|------------------|-----------------|------------------|-----------------|-----------------|----------------------------------|
| <b>WHO-5</b>     | Intercept        | 36.62           | 0.89             | 41.251          | <.001           | .04                              |
|                  | Time (Study)     | -3.94           | 1.26             | -3.128          | <.001           |                                  |
|                  | Gender           | 7.99            | 2.00             | 3.993           | <.001           |                                  |
|                  | Time*gender      | 3.36            | 2.81             | 1.195           | .233            |                                  |
| <b>PHQ-9</b>     | Intercept        | 11.99           | 0.28             | 42.477          | <.001           | .06                              |
|                  | Time (Study)     | 2.17            | 0.40             | 5.419           | <.001           |                                  |
|                  | Gender           | -2.80           | 0.64             | -4.408          | <.001           |                                  |
|                  | Time*gender      | -0.66           | 0.89             | -0.735          | .462            |                                  |
| <b>GAD-7</b>     | Intercept        | 10.80           | 0.2316           | 46.648          | <.001           | .05                              |
|                  | Time (Study)     | 0.68            | 0.3282           | 2.077           | .038            |                                  |
|                  | Gender           | -2.75           | 0.5218           | -5.274          | <.001           |                                  |
|                  | Time*gender      | -0.16           | 0.7333           | -0.239          | .811            |                                  |
| <b>ISI</b>       | Intercept        | 10.85           | 0.2646           | 41.022          | <.001           | .03                              |
|                  | Time (Study)     | 1.03            | 0.3750           | 2.759           | <.001           |                                  |
|                  | Gender           | -2.59           | 0.5962           | -4.347          | <.001           |                                  |
|                  | Time*gender      | 0.25            | 0.8379           | 0.301           | .763            |                                  |
| <b>PSS-10</b>    | Intercept        | 24.35           | 0.3169           | 76.827          | <.001           | .06                              |
|                  | Time (Study)     | 0.55            | 0.4491           | 1.225           | 0.221           |                                  |
|                  | Gender           | -4.14           | 0.7140           | -5.804          | <.001           |                                  |
|                  | Time*gender      | -0.73           | 1.0035           | -0.726          | 0.468           |                                  |

**Supplementary Table S3.** Statistical results for comparisons between t1 and t2 for boys and girls.

|                                 |  | t1 <sup>a</sup> vs t2 <sup>b</sup>            |          | t1 vs t2                                  |          |
|---------------------------------|--|-----------------------------------------------|----------|-------------------------------------------|----------|
|                                 |  | Girls                                         |          | Boys                                      |          |
|                                 |  | $\chi^2(df,N)$ , McNemar's OR [95%CI]         | <i>p</i> | $\chi^2(df,N)$ , McNemar's OR [95%CI]     | <i>p</i> |
| <b>PHQ-9</b>                    |  |                                               |          |                                           |          |
| ≥11                             |  | $\chi^2(1,958)=15.45, OR=1.78$<br>[1.34,2.44] | <.001    | $\chi^2(1,240)=0.955, OR=1.31$ [.79,2.26] | .328     |
| <b>GAD-7</b>                    |  |                                               |          |                                           |          |
| ≥11                             |  | $\chi^2(1,958)=4.22, OR=1.34$<br>[1.02,1.80]  | .022     | $\chi^2(1,240)=.017, OR=1$ [.57,1.76]     | .896     |
| <b>ISI</b>                      |  |                                               |          |                                           |          |
| ≥15                             |  | $\chi^2(1,958)=10.05, OR=1.63$<br>[1.21,2.25] | .002     | $\chi^2(1,240)=.432, OR=1.31$ [.65,2.86]  | .511     |
| <b>PSS-10</b>                   |  |                                               |          |                                           |          |
| ≥14                             |  | $\chi^2(1,958)=2.82, OR=1.61$ [.99,2.82]      | .093     | $\chi^2(1,240)=.000, OR=1.06$ [.502,2.27] | .999     |
| <b>Suicidal Ideation</b>        |  |                                               |          |                                           |          |
| PHQ9 Item9: ≥3                  |  | $\chi^2(1,958)=7.81, OR=1.96$<br>[1.124,3.39] | .005     | na*                                       |          |
| <b>Excessive Smartphone use</b> |  |                                               |          |                                           |          |
| ≥5h/day                         |  | $\chi^2(1,958)=8.822, OR=0.68$<br>[.527,.878] | <.001    | $\chi^2(1,240)=13.99, OR=0.37$ [219,.627] | <.001    |

Note: <sup>a</sup> t1: Sample from February 2021 (after one semester of remote schooling). <sup>b</sup> Sample from April-May 2022 (school opened and most restrictions lifted). *t(df)*: test-statistic of the t-test (degrees of freedom); d: Effect size Cohen's d;  $\chi^2$ =test-statistic of the  $\chi^2$ -Test; OR: Odds Ratio; CI: Confidence Interval: p-value (2-tailed, for  $\chi^2$  1-tailed). \*na: calculation of Mc-Nemars OR not possible due to zero events in cells.

**Supplementary Table S4.** Spearman correlations of smartphone usage and mental health outcomes in girls at t1.  
*Spearman's Rank Correlation Coefficients (rho) with confidence intervals*

| Variable             | 1. Smartphone Usage | 2. Physical Activity |
|----------------------|---------------------|----------------------|
| 1. Smartphone Usage  |                     |                      |
| 2. Physical Activity | -.289**             |                      |
| 3. GAD7-score        | .236**              | -.169**              |
| 4. PHQ9-score        | .271**              | -.194**              |
| 5. ISI-score         | .315**              | -.190**              |
| 6. WHO5-score        | -.279**             | .297**               |
| 7. PSS10-score       | .228**              | -.250**              |

*Note.* t1: Sample from February 2021 (after one semester of remote schooling).

Values in square brackets indicate the 95% confidence interval for each correlation. The confidence interval is a plausible range of population correlations that could have caused the sample correlation (Cumming, 2014). \* indicates  $p < .05$ . \*\* indicates  $p < .01$ .

**Supplementary Table S5.** Spearman correlations of smartphone usage and mental health outcomes in boys at t1.  
*Spearman's Rank Correlation Coefficients (rho) with confidence intervals*

| Variable             | 1. Smartphone Usage | 2. Physical Activity |
|----------------------|---------------------|----------------------|
| 1. Smartphone Usage  |                     |                      |
| 2. Physical Activity | -.325**             |                      |
| 3. GAD7-score        | .416**              | -.303**              |
| 4. PHQ9-score        | .433**              | -.367**              |
| 5. ISI-score         | .294**              | -.252                |
| 6. WHO5-score        | -.361**             | .424**               |
| 7. PSS10-score       | .338**              | -.326**              |

*Note.* t1: Sample from February 2021 (after one semester of remote schooling).

Values in square brackets indicate the 95% confidence interval for each correlation. The confidence interval is a plausible range of population correlations that could have caused the sample correlation (Cumming, 2014). \* indicates  $p < .05$ . \*\* indicates  $p < .01$ .

**Supplementary Table S6.** Differences in correlation coefficients between t1 and t2 in girls.

| Variable             | 1                       | 2                       |
|----------------------|-------------------------|-------------------------|
| 1. Smartphone Usage  |                         |                         |
| 2. Physical Activity | $Z=-1.123$<br>$p=0.131$ |                         |
| 3. GAD7-score        | $Z=1.615$<br>$p=0.053$  | $Z=0.367$<br>$p=0.357$  |
| 4. PHQ9-score        | $Z=0.935$<br>$p=0.175$  | $Z=-0.478$<br>$p=0.316$ |
| 5. ISI-score         | $Z=2.143$<br>$p=0.016$  | $Z=2.143$<br>$p=0.016$  |
| 6. WHO5-score        | $Z=-1.084$<br>$p=0.139$ | $Z=-1.387$<br>$p=0.083$ |
| 7. PSS10-score       | $Z=1.343$<br>$p=0.09$   | $Z=1.292$<br>$p=0.098$  |

Note. t1: Sample from February 2021 (after one semester of remote schooling),  
t2: Sample from April-May 2022 (school opened and most restrictions lifted).

**Supplementary Table S7.** Differences in correlation coefficients between t1 and t2 in boys.

| Variable             | 1                      | 2                       |
|----------------------|------------------------|-------------------------|
| 1. Smartphone usage  |                        |                         |
| 2. Physical activity | $Z=-1.47$<br>$p=0.071$ |                         |
| 3. GAD7-score        | $Z=2.152$<br>$p=0.016$ | $Z=-0.738$<br>$p=0.23$  |
| 4. PHQ9-score        | $Z=0.88$<br>$p=0.189$  | $Z=-2.354$<br>$p=0.009$ |
| 5. ISI-score         | $Z=-.504$<br>$p=0.307$ | $Z=-0.923$<br>$p=0.178$ |
| 6. WHO5-score        | $Z=-1.06$<br>$p=0.145$ | $Z=1.63$<br>$p=0.052$   |
| 7. PSS10-score       | $Z=0.231$<br>$p=0.409$ | $Z=0.288$<br>$p=0.387$  |

*Note.* t1: Sample from February 2021 (after one semester of remote schooling),  
t2:Sample from April-May 2022 (school opened and most restrictions lifted).

**Supplementary Figure S1.** Covariance balance of unmatched vs. matched samples

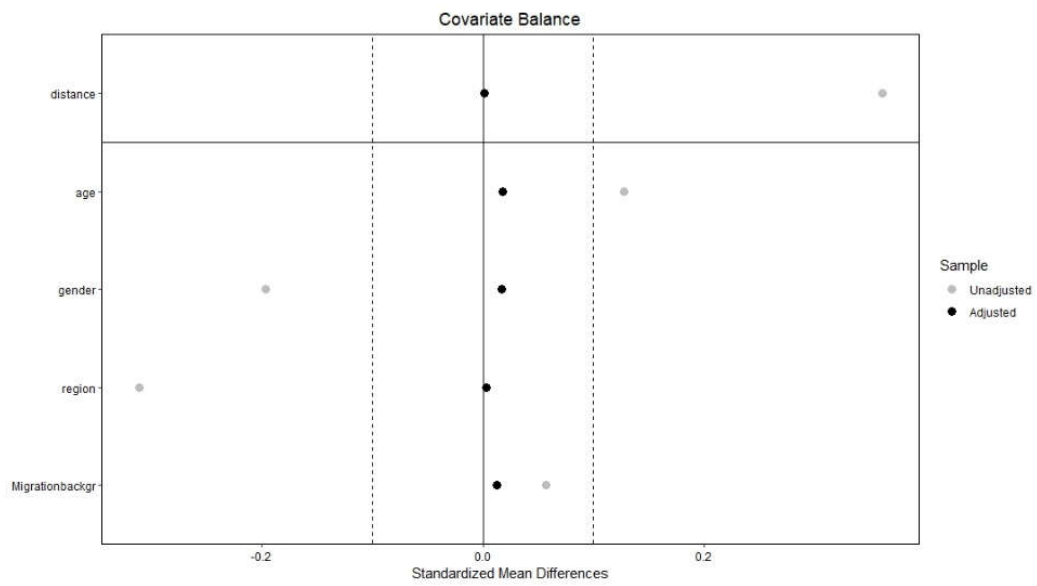

Supplement: s1 [file s1]
